# Supplementary material for: Disease-specific primed human adult stem cells effectively ameliorate experimental atopic dermatitis in mice
Source: PubMed Central journal article supplement — Theranostics. 2019 May 26;9(12):3608–21. doi: 10.7150/thno.32945 (PMC6587175; doi:10.7150/thno.32945), 2019-05-26
Supplement: thnov09p3608s1.pdf [file thnov09p3608s1.pdf]

[Supplementary Materials]

**Disease-specific primed human adult stem cells effectively ameliorate experimental atopic dermatitis in mice**

Byung-Chul Lee<sup>1</sup>, Jae-Jun Kim<sup>1</sup>, Jin Young Lee<sup>1</sup>, Insung Kang<sup>1,§</sup>, Nari Shin<sup>1</sup>, Seung-Eun Lee<sup>1</sup>, Soon Won Choi<sup>1</sup>, Je-Yoel Cho<sup>2</sup>, Hyung-Sik Kim<sup>3,4†</sup>, Kyung-Sun Kang<sup>1†</sup>

<sup>1</sup>Adult Stem Cell Research Center and Research Institute for Veterinary Science, College of Veterinary Medicine, Seoul National University, Seoul 08826, Republic of Korea

<sup>2</sup>Department of Biochemistry, BK21 PLUS Program for Creative Veterinary Science Research and Research Institute for Veterinary Science, College of Veterinary Medicine, Seoul National University, Seoul 08826, Republic of Korea

<sup>3</sup>Department of Life Science in Dentistry, School of Dentistry, Pusan National University, Yangsan 50612, Republic of Korea

<sup>4</sup>Institute for Translational Dental Sciences, Pusan National University, Yangsan 50612, Republic of Korea

<sup>§</sup>Current address: Program in Developmental Endocrinology and Genetics, Eunice Kennedy Shriver National Institute of Child Health and Human Development, NIH, Bethesda, MD 20892, USA

<sup>†</sup>Authors share co-corresponding authorship

Kyung-Sun Kang, D.V.M., Ph.D.

Adult Stem Cell Research Center, College of Veterinary Medicine, Seoul National University, 1 Gwanak-ro, Gwanak-gu, Seoul 08826, South Korea

Tel. +82-2-880-1246

E-mail: [kangpub@snu.ac.kr](mailto:kangpub@snu.ac.kr)

Hyung-Sik Kim, D.V.M., Ph.D.

Department of Life Science in Dentistry, School of Dentistry, Pusan National University, Yangsan 50612, Republic of Korea

Tel: +82-51-510-8231

E-mail: [hskimcell@pusan.ac.kr](mailto:hskimcell@pusan.ac.kr)

## **Supplementary Methods**

### **Th2 cell isolation and polarization**

Naïve CD4<sup>+</sup> T lymphocytes were isolated from PBMCs using a naïve CD4<sup>+</sup> T cell isolation kit (Miltenyi Biotec, Bergisch Gladbach, Germany) according to the manufacturer's instruction. Isolated cells were treated with 50 ng/ml of interleukin (IL)-2 and anti-CD3/28 beads for proliferation. For Th2 cell-specific polarization, 50 µg/ml of anti-IFN- $\gamma$ , 25 ng/ml of IL-4 and 25 ng/ml of IL-6 were supplemented in the medium and cultured for 5 days in the presence of MC-primed hUCB-MSCs. Polarized Th2 cells were analyzed by detecting surface or intracellular markers using flow cytometry. For surface marker staining, Th2 cells were fixed and incubated with FITC-conjugated anti-CD4. For intracellular marker staining, cells were fixed and permeabilized with an intracellular staining buffer set (BD Biosciences, San Jose, CA, USA) and then incubated with PE-conjugated anti-IL-4 antibody. Detection was performed with a FACScalibur flow cytometer and evaluated using Cell Quest software (BD Bioscience).

## Supplementary Figures

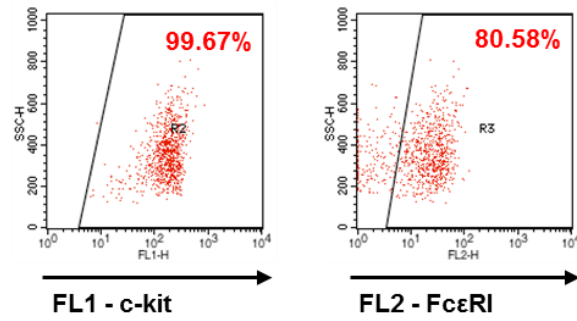

**Figure S1. Cell surface marker expression of LAD2 cells.** The expression of mast cell-specific markers, c-kit and FcεRI in LAD2 cells was measured by flow cytometric analysis. Results show a representative experiment.

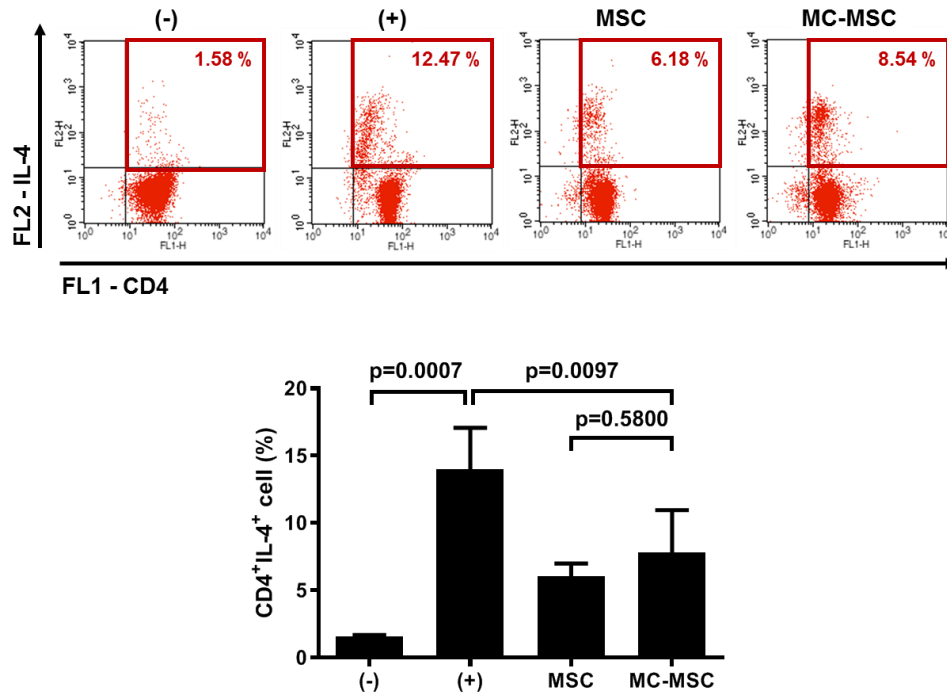

**Figure S2. MC-primed hUCB-MSCs does not exert any significant change on the suppression of Th2 cells.** Naïve CD4<sup>+</sup> T cells were isolated from PBMCs and cultured with anti-CD3/28 beads, 50 µg/ml anti-IFN-γ, 50 ng/ml IL-2, 25 ng/ml IL-4 and 25 ng/ml IL-6 for 5 days. The expression of cellular markers were determined by flow cytometric analysis. (-): Negative control group, (+): Th2 polarized cell group, MSC: hUCB-MSC co-cultured group, MC-MSC: MC-primed hUCB-MSC co-cultured group. *In vitro* experiments were performed in triplicate, using hUCB-MSCs isolated from each different donor (N=3). The results are shown as the mean ± SD.

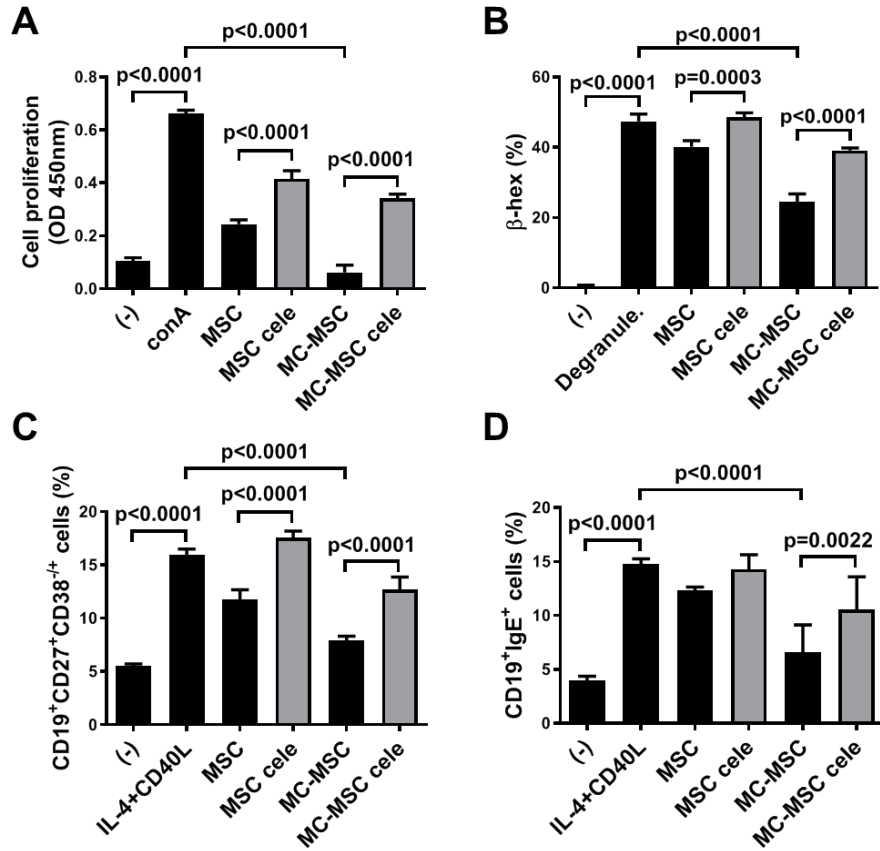

**Figure S3. Selective inhibition of COX-2 impedes the suppressive effect of MC-primed hUCB-MSCs on activation of disease-related immune cells.** (A) Immunosuppressive properties of primed hUCB-MSCs were determined by the MLR assay. (B) After co-culture with hUCB-MSCs during the sensitization period (24 h), LAD-2 cells were challenged with anti-IgE (3  $\mu$ g/ml). The degranulation rate of LAD2 cells was assessed by detecting  $\beta$ -hexosaminidase in the cultured medium. (C-D) Naïve B lymphocytes were isolated from hPBMCs and cultured for 5 days in medium supplemented with CD40L (100 ng/ml) and IL-4 (25 ng/ml) in the presence of MC-primed hUCB-MSCs. Maturation (C) and IgE production (D) were determined by flow cytometric analysis. *In vitro* experiments were performed in triplicate, using hUCB-MSCs isolated from each different donor (N=3). The results are shown as the mean  $\pm$  SD.

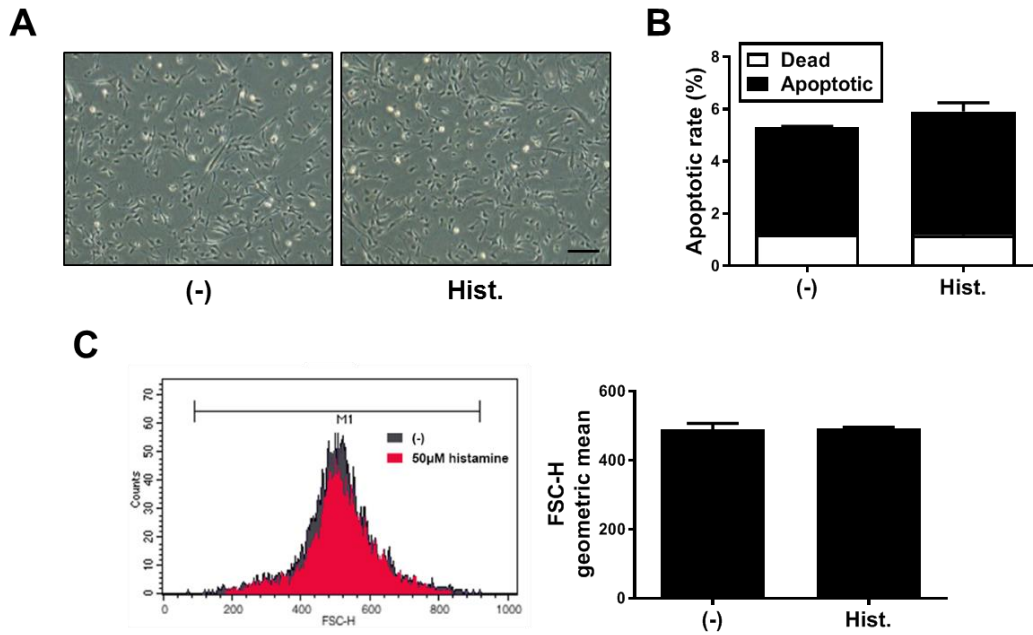

**Figure S4. Histamine treatment does not induce toxic effect on hUCB-MSCs.** hUCB-MSCs were treated with 50  $\mu$ M histamine for 24 h. **(A)** Morphological change after the histamine treatment was observed by microscope, bar = 100  $\mu$ m. **(B-C)** Apoptosis **(B)** and cell size **(C)** were determined by flow cytometric analysis. *In vitro* experiments were performed in triplicate, using hUCB-MSCs isolated from each different donor (N=3). The results are shown as the mean  $\pm$  SD.

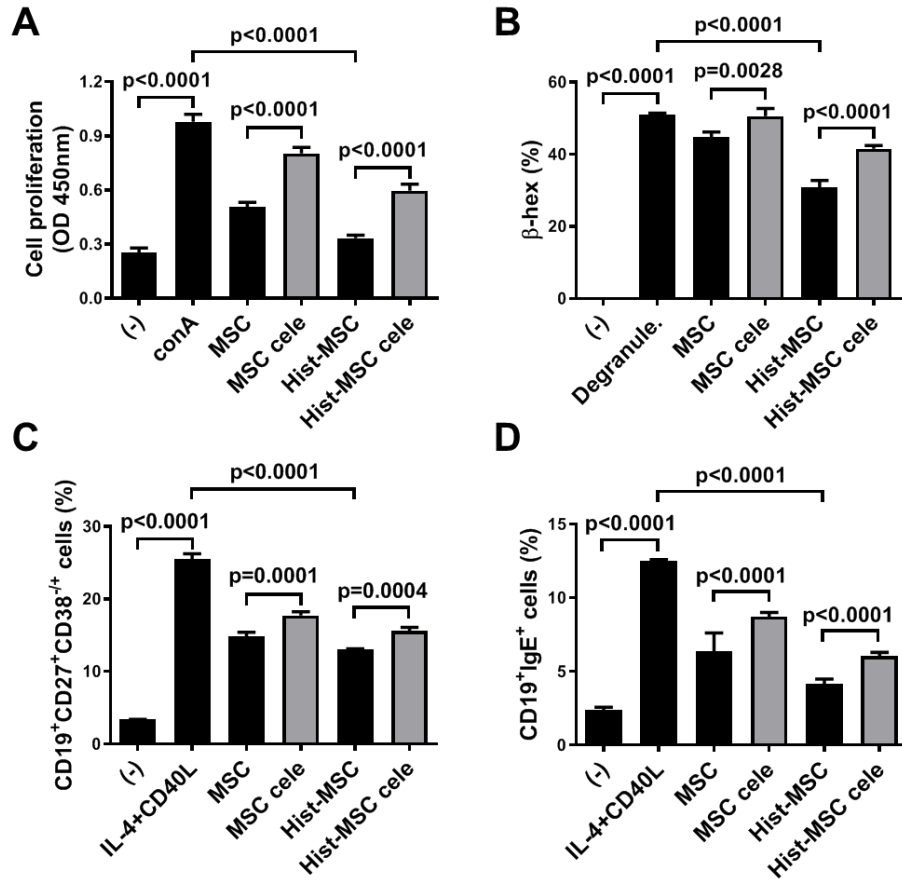

**Figure S5. Selective inhibition of COX-2 hinders the immunomodulatory function of histamine-treated hUCB-MSCs.** (A) Immunosuppressive properties of primed hUCB-MSCs were determined by the MLR assay. (B) After co-culture with hUCB-MSCs during the sensitization period (24 h), LAD-2 cells were challenged with anti-IgE (3  $\mu$ g/ml). The degranulation rate of LAD2 cells was assessed by detecting  $\beta$ -hexosaminidase in the cultured medium. (C-D) Naïve B lymphocytes were isolated from hPBMCs and cultured for 5 days in medium supplemented with CD40L (100 ng/ml) and IL-4 (25 ng/ml) in the presence of histamine-treated hUCB-MSCs. Maturation (C) and IgE production (D) were determined by flow cytometric analysis. *In vitro* experiments were performed in triplicate, using hUCB-MSCs isolated from each different donor (N=3). The results are shown as the mean  $\pm$  SD.



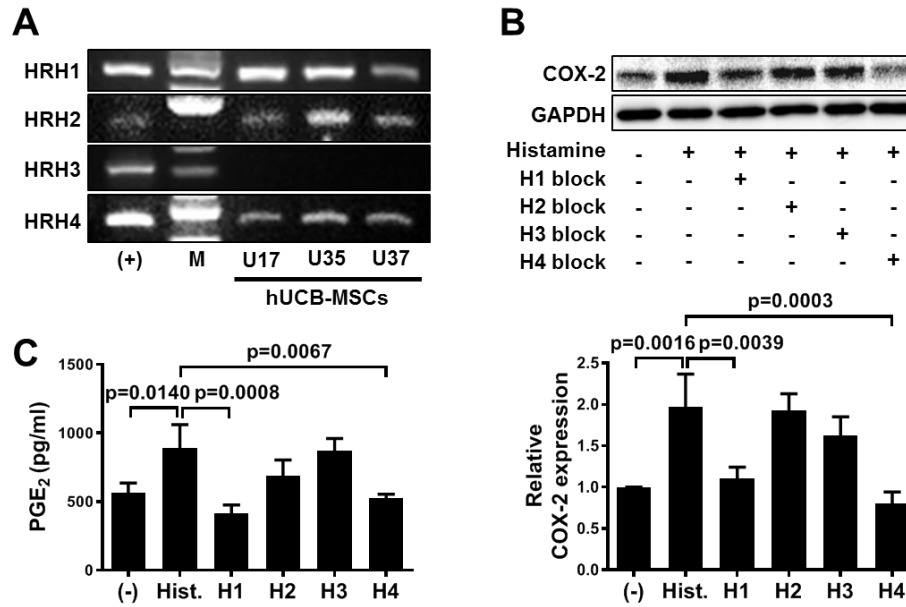

**Figure S6. The expression pattern of histamine receptors in hUCB-MSCs and its role in COX-2~PGE<sub>2</sub> axis.** (A) The expression of histamine receptor subtypes were determined by PCR and gel electrophoresis. Positive control for H1, 2 and 4: HT29 cell, H3: HeLa cell. (B-C) In the presence of histamine, inhibitory effect of subtype-specific antagonists for histamine receptors on the expression of COX-2 (B) and secretion of PGE<sub>2</sub> (C) were assessed by western blot analysis and ELISA, respectively. Blockers for H1: diphenhydramine hydrochloride, H2: cimetidine, H3: ciproxifan hydrochloride, H4: JNJ7777120. *In vitro* experiments were performed in triplicate, using hUCB-MSCs isolated from each different donor (N=3). The results are shown as the mean  $\pm$  SD.

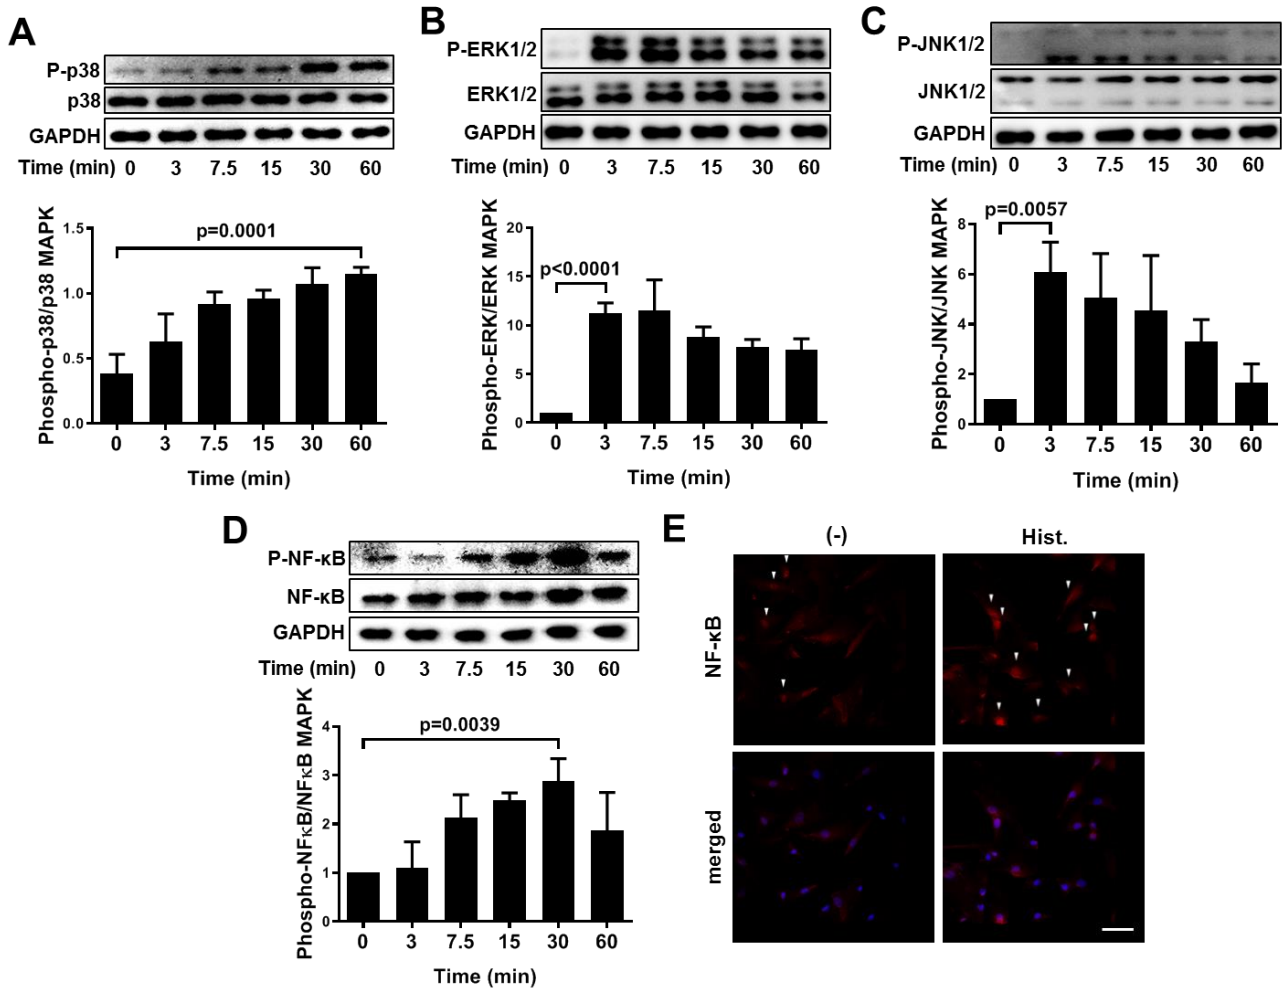

**Figure S7. Histamine activates NF- $\kappa$ B pathway of hUCB-MSCs to upregulate COX-2 signaling.** (A-D) hUCB-MSCs were treated with 50  $\mu$ M histamine and cell lysates were collected at each indicated time point. Time-dependent phosphorylation of P(Thr<sup>180</sup>/Tyr<sup>182</sup>)-p38 (A), P(Thr<sup>202</sup>/Tyr<sup>204</sup>)-ERK1/2 (B), P(Thr<sup>183</sup>/Tyr<sup>185</sup>)-JNK1/2 (C) and P(SER<sup>536</sup>)-NF- $\kappa$ B (D) in histamine-treated hUCB-MSCs was determined by western blot analysis and quantified. (E) Immunocytochemistry analysis of NF- $\kappa$ B after treatment with histamine, bar = 100  $\mu$ m. *In vitro* experiments were performed in triplicate, using hUCB-MSCs isolated from each different donor (N=3). The results are shown as the mean  $\pm$  SD.

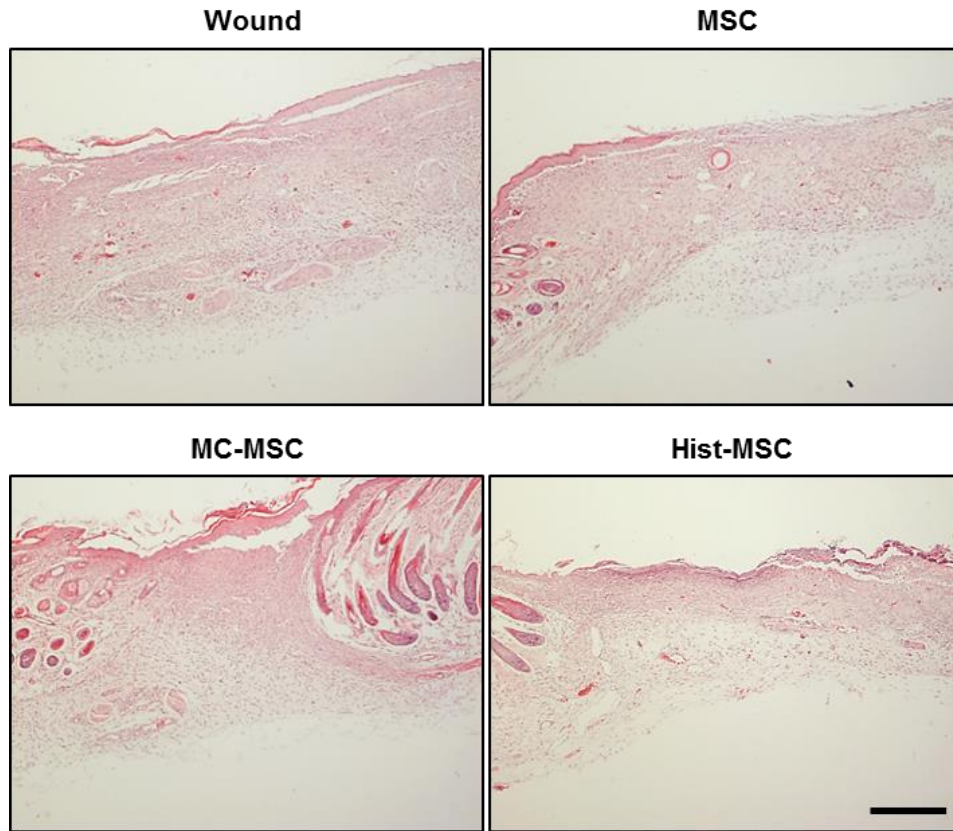

**Figure S8. MC granule-primed hUCB-MSCs ameliorate histopathological symptoms in dorsal skin of excisional wound mice more efficiently than naïve and histamine-treated cells.** The dorsal skin of BALB/c mice was punched with a 5-mm-diameter biopsy punch, and  $1 \times 10^6$  MC-primed hUCB-MSCs were immediately infused subcutaneously. Each group of mice was monitored and sacrificed on day 14 for further *ex vivo* examinations. Representative H&E-stained images of dorsal skin (n=5), bar = 500  $\mu$ m. Wound: Excisional wound mice group, MSC: hUCB-MSC-injected group, MC-MSC: MC-primed hUCB-MSC-injected group, Hist-MSC: histamine-treated hUCB-MSC-injected group.
